# Supplementary material for: Imbalanced tunneling ready states in alcohol dehydrogenase model reactions: rehybridization lags behind H-tunneling
Source: Royal Society of Chemistry journal article supplement (doi:10.1039/c2cc36110h), 2012-01-01
Supplement: c2cc36110h.pdf [file c2cc36110h.pdf]

## Supplementary Information

### **Imbalanced Tunneling Ready States in Alcohol Dehydrogenase Model Reactions: Rehybridization Lags behind H-Tunneling**

**Blake Hammann, Mortezaali Razzaghi, Sadra Kashfolgheta and Yun Lu\***

Department of Chemistry, Southern Illinois University Edwardsville, Edwardsville, IL  
62025, USA

#### ***General procedures***

9-Phenylxanthylum tetrafluoroborate ( $\text{PhXn}^+\text{BF}_4^-$ ) and xanthylum perchlorate ( $\text{Xn}^+\text{ClO}_4^-$ ) were synthesized from the reactions of the corresponding alcohol precursors with  $\text{HBF}_4$  or  $\text{HClO}_4$  in propionic anhydride or acetic anhydride according to a published procedure.<sup>1</sup> 2-Propanol- $\beta$ - $\text{d}_6$  ( $(\text{CD}_3)_2\text{CHOH}$ ), 2-Propanol- $\alpha$ - $\text{d}_1$  ( $(\text{CH}_3)_2\text{CDOH}$ ) and 2-Propanol- $\alpha$ - $\text{d}_1$ - $\beta$ - $\text{d}_6$  ( $(\text{CD}_3)_2\text{CDOH}$ ) were prepared by the reduction of acetone or acetone- $\text{d}_6$  with  $\text{NaBH}_4$  or  $\text{NaBD}_4$  according to a procedure described in literature.<sup>2</sup> 2-propanol-O-d ( $(\text{CH}_3)_2\text{CHOD}$ ) was prepared by deuterium exchange of the OH group in the normal 2-propanol with  $\text{DCl}$  in  $\text{D}_2\text{O}$  in the  $\text{N}_2$  atmosphere. The D content was determined by NMR to be 99.4% per C-D bond. In order to perform direct kinetic comparison, normal 2-propanol was also synthesized by reduction of acetone with  $\text{NaBH}_4$ . The 9-deuterated xanthylum ion ( $\text{Xn}(\text{D})^+$ ) was synthesized from 9-deuterated xanthidrol that was made from the reduction of xanthone by  $\text{NaBD}_4$  in methanol/THF ( $v/v = 1$ ). The D-content was found to be 96% by NMR. Acetonitrile was distilled over  $\text{KMnO}_4/\text{K}_2\text{CO}_3$  and then  $\text{P}_2\text{O}_5$  before use.

### ***Kinetic measurement and data analysis***

The procedure for the kinetic determination of the reactions of  $\text{PhXn}^+$  was reported previously,<sup>3</sup> and that for the reactions of  $\text{Xn}^+$  is as follows. 2 mL of alcohol solution of certain concentration (e.g. 0.012 M) in MeCN was placed in a cuvette sitting in a thermostated UV-Vis cell holder. 32  $\mu\text{L}$  of 0.0025 M  $\text{Xn}^+$  stock solution (in MeCN) was rapidly transferred to the alcohol solution and the decay in absorbance ( $A$ ) at 372 nm due to  $\text{Xn}^+$  with time ( $t$ ) was recorded for about 2 half-lives (Figure S1). The obtained  $\ln(A) - t$  data were fitted to the pseudo-first-order rate law and the slope of the linear correlation ( $R^2 > 0.997$ , mostly  $> 0.999$ ) was taken as the pseudo-first-order rate constant ( $k^{\text{pfo}}$ ). Second-order rate constant ( $k = k^{\text{pfo}} / [\text{alcohol}]$ ) and KIE ( $=k_{\text{H}}/k_{\text{D}}$ ) were calculated. For the determination of small secondary KIEs, a back to back determination of kinetics of the reactions of H- and D- compounds was carried out in order to keep the consistent kinetic conditions. Typical determinations of the second-order rate constants and the 1° and 2° KIEs for each reaction are shown in Table S1.

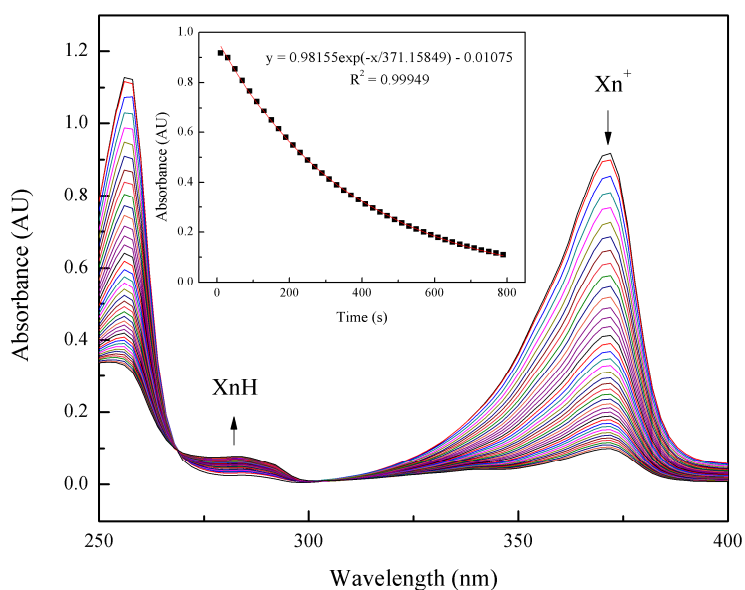

**Figure S1.** Kinetic scans for the reaction of 2-propanol (0.012 M) and  $Xn^+$  ( $4 \times 10^{-5}$  M) in MeCN at 60 °C. The inset shows the first-order exponential fit of the decay of absorbance at 372 nm with time.

**Table S1.** A typical determination of the 1° and 2° KIEs for the reactions in MeCN at 60°C<sup>a</sup>

|                                                                                                | $k$ ( $M^{-1}s^{-1}$ ) | 1° KIE       | $\beta$ -D <sub>6</sub> 2° KIE<br>on 2-propanol | $\alpha$ -2° KIE<br>on $Xn^+$ |
|------------------------------------------------------------------------------------------------|------------------------|--------------|-------------------------------------------------|-------------------------------|
| <u>Determination of the <math>\beta</math>-D<sub>6</sub> 2° KIEs on 2-propanol<sup>b</sup></u> |                        |              |                                                 |                               |
| <i>For the reaction of <math>CL_3CY(OH)CL_3</math> with <math>PhXn^+</math></i>                |                        |              |                                                 |                               |
| Y = H, L = H                                                                                   | $3.26 \times 10^{-4}$  | 3.39 (L = H) | 1.05 (Y = H)                                    |                               |
| Y = H, L = D                                                                                   | $3.10 \times 10^{-4}$  |              |                                                 |                               |
| Y = D, L = H                                                                                   | $9.63 \times 10^{-5}$  |              | 0.97 (Y = D)                                    |                               |
| Y = D, L = D                                                                                   | $9.64 \times 10^{-5}$  |              |                                                 |                               |
| <i>For the reaction of <math>CL_3CY(OH)CL_3</math> with <math>Xn^+</math></i>                  |                        |              |                                                 |                               |
| Y = H, L = H                                                                                   | 0.256                  | 2.76 (L = H) | 1.05 (Y = H)                                    |                               |
| Y = H, L = D                                                                                   | 0.244                  |              |                                                 |                               |
| Y = D, L = H                                                                                   | 0.0927                 |              | 1.06 (Y = D)                                    |                               |
| Y = D, L = D                                                                                   | 0.0870                 |              |                                                 |                               |

Determination of the  $\alpha$ -2° KIEs on Xn(L)<sup>+</sup>c

For the reaction of CH<sub>3</sub>CY(OH)CH<sub>3</sub> with Xn(L)<sup>+</sup>

|              |       |              |              |
|--------------|-------|--------------|--------------|
| Y = H, L = H | 0.282 | 2.50 (L = H) | 0.98 (Y = H) |
| Y = D, L = H | 0.113 |              | 0.97 (Y = D) |

|              |       |  |  |
|--------------|-------|--|--|
| Y = H, L = D | 0.289 |  |  |
| Y = D, L = D | 0.116 |  |  |

For the reaction of CH<sub>3</sub>CY(OH)CH(CH<sub>3</sub>)<sub>2</sub> with Xn(L)<sup>+</sup>

|              |       |              |              |
|--------------|-------|--------------|--------------|
| Y = H, L = H | 0.289 | 2.59 (L = H) | 1.01 (Y = H) |
| Y = D, L = H | 0.112 |              | 0.99 (Y = D) |

|              |       |  |  |
|--------------|-------|--|--|
| Y = H, L = D | 0.287 |  |  |
| Y = D, L = D | 0.113 |  |  |

For the reaction of cyclo-(CH<sub>2</sub>)<sub>5</sub>CYOH with Xn(L)<sup>+</sup>

|              |       |              |              |
|--------------|-------|--------------|--------------|
| Y = H, L = H | 0.825 | 2.26 (L = H) | 1.00 (Y = H) |
| Y = D, L = H | 0.365 |              | 0.97 (Y = D) |

|              |       |  |  |
|--------------|-------|--|--|
| Y = H, L = D | 0.823 |  |  |
| Y = D, L = D | 0.373 |  |  |

---

<sup>a</sup> from 3 to 4 repetitions under the consistent reaction conditions (same solutions and at the same day, back to back determinations of the reactions of H- and D- substrates), the KIEs reported in the *Communication* (Table 1) are the average of many (4 to 8) such determinations; <sup>b</sup> by Blake Hammann; <sup>c</sup> by Mortezaali Razzaghi.

**Correction of 2° KIE<sub>obs</sub> on Xn<sup>+</sup>**

Since 9-deuterated xanthylum ion (Xn(D)<sup>+</sup>) contains 4% normal Xn<sup>+</sup> (Xn<sup>+</sup>(H)) (from <sup>1</sup>H NMR), a correction of the observed 2° KIE<sub>obs</sub> needs to be made. Using  $k_{H(D)}$  to represent the rate constants of the reactions with Xn(H)<sup>+</sup> and Xn(D)<sup>+</sup>, respectively, according to  $2^\circ \text{KIE}_{\text{obs}} = k_{\text{H}} / (0.04k_{\text{H}} + 0.96k_{\text{D}})$ ,  $2^\circ \text{KIE} = k_{\text{H}} / k_{\text{D}}$  was calculated and reported.

1. Dauben Jr, H. J.; Honnen, L. R.; Harmon, K. M. *J. Org. Chem.* **1960**, *25*, 1442-1445.
2. Thompson, M. S.; Meyer, T. J. *J. Am. Chem. Soc.* **1982**, *104*, 4106-4115.

3. Lu, Y.; Qu, F; Zhao, Y.; Small, A. M. J.; Bradshaw, J.; Moore, B. *J. Org. Chem.* **2009**, *74*, 6503-6510.
